# Supplementary material for: Mantle flow under the Central Alps: Constraints from non-vertical SKS shear-wave splitting
Source: Copernicus journal article supplement (doi:10.5194/se-2020-5), 2020-02-24
Supplement: Supplementary file [file se-2020-5-AC2-supplement.pdf]

### Comments of Referee #3

The authors aim to characterize geodynamic processes in the Western and Central Alps from the azimuthal variation of shear-wave splitting measurements of core-mantle converted S-phases (S(K)KS) considering their non-vertical incidence. The applied method allows to differentiate between a mainly lithospheric or asthenospheric origin for the measured anisotropy, as the polarity of the fast axis variation shows opposite sign. The mechanisms relate to b-up and c-up olivine alignment resulting in horizontal foliation for the asthenospheric flow model and vertical foliation for vertical coherent deformation. They apply the analysis to previously published shear-wave splitting measurements at permanent stations in the Western and Central Alps first for the full study area and subsequently to a northern and a southern subarea based on a travel time integrated dvp-model of Koulakov et al. (2009). Their findings favour the asthenospheric flow model as origin for the anisotropy for the data set of the full data set and the northern subarea. The southern subarea allows no precise statement, most likely due to the limited event coverage. They conclude, that the anisotropy in the region is originated by a Poiseuille flow driven by the Apenninic slab rollback, likely to coincide with a Couette flow linked to the absolute plate motion. The authors argue also, that a mainly lithospheric origin for the southern subregion is to be expected, due to a dominant effect of the slab. The method applied in this paper has the potential to improve our understanding of the link between geodynamic processes and measured anisotropy. It is promising with respect to the huge data set of the previous publication, that similar results could be found here for the Central Alps indicating an asthenospheric origin. Nevertheless, there are **some major and minor issues**, which give rise to questions.

1) **The study neglects important aspects and possibly equivalent models, that could explain the analysed data.** Due to this incompleteness the **conclusions drawn in this paper remain ambiguous**, while a short discussion or comparison could likely clarify these open questions.

- *To introduce the new observational constraint, we juxtaposed two simple models in Fig. 2, and found that one of them matches the observations. We then introduced the new constraint into the geodynamic discussions, and addressed the main groups of models, we believe.*

2) Generally, the submitted manuscript contains some **weaknesses in language and structure**. While it should be revised for grammar and wording, I would also recommend **reducing the section about the tectonic setting**. A **more focused introduction** leading to the **main open questions** discussed in this paper would be sufficient. The paper might benefit generally from a **clearer structure**.

- *We tried to improve the structure of the whole manuscript following Referee #1. Just page 4 remained in the Tectonic Settings section. The Introduction got extended and includes the previous ideas of Barruol et al. (2011), Qorbani et al. (2015) and Salimbeni et al. (2018) on the relation of slab geometries and mantle flow in the region, which are of crucial importance for the understanding of the paper.*

3) As the method is based on an azimuthal variation of the splitting parameters, **a more detailed discussion should be included, clarifying, why a multiple layered anisotropy can be neglected** as cause for the observed azimuthal distribution. It is not sufficient to base the single layer assumption on the spatially coherent anisotropy (page 1/line 10-11, page 3/line 8). Multiple layers with individually spatial coherent anisotropy will also produce spatially coherent distribution for the measured splitting (of course with azimuthal variation at each individual station). This question remains with respect to the limited azimuthal coverage, which appears sparser in figure 4 than described in the paper (page 8/line 5). A 90° periodicity, as expected for layered anisotropy, cannot be excluded. Therefore, **I would suggest showing a fit of a two-layer anisotropy at exemplary stations to allow a meaningful discussion.**

- *Assuming a single-layer case of seismic anisotropy beneath the Central Alps is widely accepted. That's why we have chosen the area for our investigation. As stated in Barruol et al. (2011) referring to the distribution of shear-wave splitting parameters: "Swiss stations do not show clear evidence of backazimuthal variation of these parameters in the SKS period range (i.g., between 5 and 20s) yet the azimuthal coverage is uneven. The seismic rays are mostly incident within the NE and SW quadrant." Thus, we do not see the need for a two-layer case test. We still revised the sentences mentioned to:*
- *... a spatially coherent and relatively simple mountain-chain-parallel pattern, without large azimuthal variations per stations, ...*
- *As azimuthal variations per station are comparably small (Barruol et al., 2011) a single-layer case of seismic anisotropy is likely.*
- *... accumulate mainly for backazimuths of ~ 41° - 86°, 200° and 241° - 299°.*

4) The favoured Couette-Poiseuille flow in abstract and conclusion seems contradicting to the main assumption of a single layer anisotropy resulting in an azimuthal variation of splitting parameters solely caused by the non-vertical incidence of S(K)KS-phases. A Couette-Poiseuille flow would produce a depth dependent fast axis direction resulting in azimuthal variation of phi and dt (with 90° periodicity). I agree with the first conclusion made in this paper, that the data is best explained with a Poiseuille flow model.

- *We agree in that point. The conclusion on a Couette-Poiseuille flow went too far, as despite of the worse depth resolution of S(K)KS phases, this could indeed be understood as contradicting with the single-layer assumption. We changed our initial finding in abstract and conclusion to:*
- *... the northern subarea shows indications of a planar Poiseuille flow contribution around the Alps.*
- *Instead a planar Poiseuille flow contribution ...*

In the following I will list some minor suggestions for improvement

- Further topics to be discussed or mentioned

5) Page 2/Line 2: LPO of olivine is not the only origin for anisotropy (Savage 1999).

- *We mention also other minerals like orthopyroxene, clinopyroxene and garnet below, but extended the sentence now to:*
- *However, LPO of olivine is not the only origin of anisotropy (Savage, 1999). Other minerals like orthopyroxene, clinopyroxene and garnet are also anisotropic ...*

6) Page 2/Line 6: What is about other depth regions and their contribution to anisotropy?

- *Other depth regions also contribute to anisotropy, but as SKS and SKKS phases are mainly sensitive to upper mantle anisotropy, we will only mention them shortly:*
- *Following previous studies, summarized in Savage (1999), the occurrence of anisotropy is not restricted to the upper mantle only. In addition, the D'' layer, as well as other depth intervals like the crust, generate anisotropic behavior. Although, the latter is related to e.g. the alignment of cracks or alternating layers of different seismic velocities.*

7) Page 2/Line 18-19: The elliptical motion is also depending on the **frequency content** of the core-mantle converted phase (see Rümpker & Silver 1998)

- *That is true of course. We have decided to take out that sentence though that does not really seem to be necessary for the introduction.*

8) Page 2/Line 24: This is not generally true, as there are also **other effects producing anisotropy** e.g. alignment of cracks in the crust or alternating layers of different seismic velocities. (Savage 1999)

- *Also here we have decided to take out the sentence to shorten the introduction.*

9) Page 3/Line 11: It would be helpful at this point to state the contradicting arguments, and also pick up on them again in the discussions section to show **how the understanding of the geodynamic processes is improved by this paper** (and what arguments are ruled out by this paper).

- *As we shifted page 5 into the introduction, the models of Barruol et al. (2011), Salimbeni et al. (2018) and Qorbani et al. (2015) are now explained before. We pick up on Salimbeni et al. (2018) in our discussion and further constrain a Poiseuille flow contribution to the counter flow. The contradicting tectonics settings Kästle et al. (2019) mentioned, relate more to the slab geometry, which we cannot clarify with our new methodology. We think they are thus beyond the scope of the paper.*

10) Page 6/Line 1: This section summarizes the theory found in Löberich & Bokelmann 2020. Nevertheless, it would be important to also **point out the limitations and the assumptions** the theory is based on (e.g. the symmetry system).

- *Most of the assumptions and limitations are listed in the next line: Taylor-series expansion, horizontally-oriented single-layer case, orthorhombic seismic anisotropy.*

11) Page 8/Line 8: **Does the number of measurements at one station have a large impact** on the results or the observables  $d\phi$  and  $ddt$ ?

- *A larger number of measurements will be advantageous in a single-layer case. As we mention, it helps to determine the means/medians of SWS parameters per station more stably. We further added another sentence to this paragraph:*
- *A larger number of high-quality measurements per station is thus advantageous for pinpointing  $\delta\phi$  and  $\delta\Delta t$ .*

12) Page 10/Line 26-29: The **southern subarea is also characterized by less data coverage.** Might that also be a **reason for the different observation** compared to the northern subarea?

- *Yes, that is true. We state this a bit later in the next paragraph, when comparing the results of the non-vertical-ray SWS analysis for both subareas, but as it is also a finding of the histogram, we added it to these lines:*
- *In comparison to the northern subarea, the southern subarea is less well-constrained.*

13) Page 13/ Line 12-13: That the data supports a high-temperature mechanism is an important conclusion here, as it is stated. While it is mentioned, that geological observations favour a different mechanism, **are there geological observations in the area, that support this mechanism?**

- *We refer here to girdle configurations often assumed by petrologists in general not specifically in the Central Alps context.*

- Suggestions for reduction

14) Page 2/Line 12-13: the **comparison with optical anisotropy seems unnecessary** at this point, as it is not used further to explain the properties of seismic anisotropy.

➤ *Ok, we removed the comparison.*

15) Page 4/Line 1: This **section might be too long and detailed**, as this paper aims solely to differentiate between an asthenospheric and lithospheric origin for the measured anisotropy.

➤ *We also see the differentiation between asthenospheric and lithospheric cause of anisotropy in the focus of our paper, but the background knowledge about the alpine geological history should not be neglected.*

➤ *By shifting page 5 to the Introduction following Referee #1, the Tectonic Settings were already shortened. We further tried to shrink the first paragraph, but it is already condensed.*

16) Page 12/Line 12: This **statement seems not to fit to the context** of the publication.

➤ *Ok, we shortened it to:*

➤ *In any case, the importance of an observation is not necessarily related to its size.*

17) Page 12/Line 23-24: It is **not clear how an extended period of the AlpArray experiment is connected** to the current paper.

➤ *This seems to be a misunderstanding. In this paragraph we consider possibilities to improve the backazimuthal coverage. As the area is already densely covered, the additional AlpArray stations would not change the overall picture drastically. Extending the time period of the permanent stations used so far would be more interesting. We rephrased the sentence to:*

➤ *Since the area of study is already quite well-covered with permanent broadband instruments, but the dataset so far only covers a relatively limited time duration, it can in principle be extended for a longer time period.*

18) Page 13/Line 1-6: The data set has been strongly simplified by taking the mean (and median) for the intervals around the extrema in dphi, which also coincide with ddt expected to be zero. With this simplification it is only natural not to see any further complexities, necessary to be fitted by a more complex model. With this **I don't think it is necessary to point out what complexities are not considered for the modeling**, as it gives no additional information for the conclusion of this paper.

➤ *Ok, we removed the sentence on other minerals and the pressure effect.*

- Technical comments

19) Page 2/Line 1: More generally the waves are affected by the medium they propagate through (not necessarily layers).

➤ *We agree, and changed it to:*

➤ *... properties of the medium they pass ...*

20) Page 2/Line 8: effect=affect

➤ *Due to our reply to 5) this part of the sentence was removed.*

21) Page 2/Line 18: “show up” = appears

- *We agree, and changed it to:*
- *... anisotropy appears as ...*

22) Page 2/Line 19: isotropic Earth = isotropic medium

- *We agree, and changed it to:*
- *... an isotropic medium, ...*

23) Page 2/Line 20: “shows a signal” – The measured time-series on the transverse component is not an independent signal. I would rather refer to the energy of the signal that occurs on the transverse component due to the splitting.

- *We agree but removed the sentence.*

24) Page 2/Line 26: “So” seems not the right word here, as resolving the foliation seems not to be related to the weak depth resolution.

- *Due to the logical inconsistency, we removed the sentence.*

25) Page 4/Line 14: “e.g.” seems to be unnecessary here

- *We agree and removed it.*

26) Page 4/Line 18: “till” = until

- *We agree, and changed it to:*
- *Exhumation took place until 20 Ma ...*

27) Page 6/Line 4: “SKS” and SKKS or S(K)KS

- *We agree, and changed it to:*
- *... non-vertical-ray SKS and SKKS phase arrival ...*

28) Page 7/Line 5: “individuals”=individual

- *We agree, and changed it to:*
- *Distribution of high-quality individual SWS measurements ...*

29) Page 8/Line 9-10: This does not seem to be a “correction”. It would be better to simply describe what is done: First the mean values are subtracted from the individual values to obtain ddt and dphi. Subsequently the backazimuth is reduced by the mean of the fast axis to shift all measurements to the same reference.

- *We agree that the sentence was too complex and rephrased it to:*
- *The backazimuthal distribution of each SWS parameter is then reduced by  $\bar{\varphi}$ , which shifts all measurements to the same reference (second row).*

30) Page 8/Line 25: A “verification” might not be possible, but it might prove it as a most probable model, which is already very promising.

- *We agree, and changed it to:*
- *A comparison with tomography of the region can test this more.*

31) Page 10/Line 21-24: This description is slightly confusing. The statements regarding the fast axis directions don't fit in the general structure of the sentence.

- *We agree, and rephrased it to:*
- *Overall the northern subarea is characterized by longer travel times, due to the lower velocities of the asthenospheric flow below, and the shorter travel times of the southern subarea are related to the high velocities of the lithospheric slab. While  $\varphi$  rotates along the Alps in the north, it seems to be parallel to the anomaly in the south. Considering ...*

32) Page 10/ Line 26: "transition" might be the wrong word to describe a drop of magnitude in a histogram.

- *We agree, and changed it to:*
- *... limited by sharp boundaries to ...*

33) Page 13/Line 31: "shear strain does too"

- *We changed it to:*
- *... and so strain varies too.*

34) Page 14/Line 31: "Now we return"

- *We removed it.*

35) Page 14/Line 35+ Page 17/Line 24: "render" – seems to be the wrong word?

- *We agree, and replaced it with:*
- *... that transfers geodetic motions...*
- *... shear-wave splitting and vertically-integrated travel times likely suggests a contribution of the lithospheric slab.*

36) Page 17/Line 4: derived=measured; angular=azimuthal

- *We agree partly, and replaced derived with observed, as the variations are not directly measured:*
- *We have compared modeled and observed azimuthal shear-wave splitting variations ...*
